# Supplementary material for: Magnesium-Free Immobilization of DNA Origami Nanostructures at Mica Surfaces for Atomic Force Microscopy
Source: MDPI journal article supplement (doi:10.3390/molecules26164798), 2021-08-07
Supplement: s1 [file s1]

# Supplementary Materials

## **Magnesium-Free Immobilization of DNA Origami Nanostructures at Mica Surfaces for Atomic Force Microscopy**

**Yang Xin, Amir Ardalan Zargariantabrizi, Guido Grundmeier and Adrian Keller \***

Technical and Macromolecular Chemistry, Paderborn University, Warburger Str. 100,  
33098 Paderborn, Germany;  
yangxin@mail.uni-paderborn.de (Y.X.); ardalan@mail.uni-paderborn.de (A.A.Z.);  
g.grundmeier@tc.uni-paderborn.de (G.G.)

\* Correspondence: adrian.keller@uni-paderborn.de

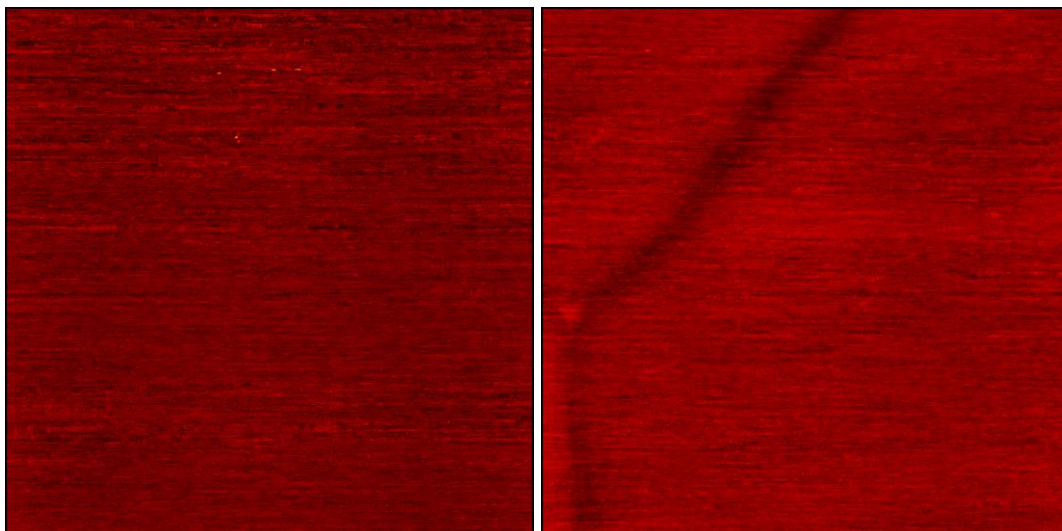

**Figure S1:** Additional AFM images of the freshly cleaved mica surface. Images are  $3 \times 3 \mu\text{m}^2$  and have a height scale of 1.5 nm.

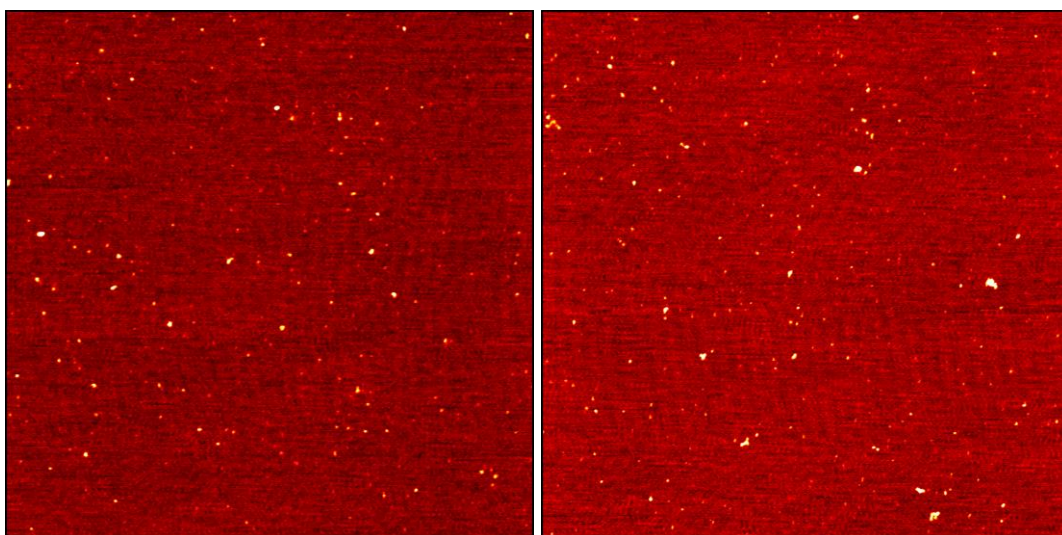

**Figure S2:** Additional AFM images of the  $\text{Ni}^{2+}$ -modified mica surface. Images are  $3 \times 3 \mu\text{m}^2$  and have a height scale of 1.5 nm.

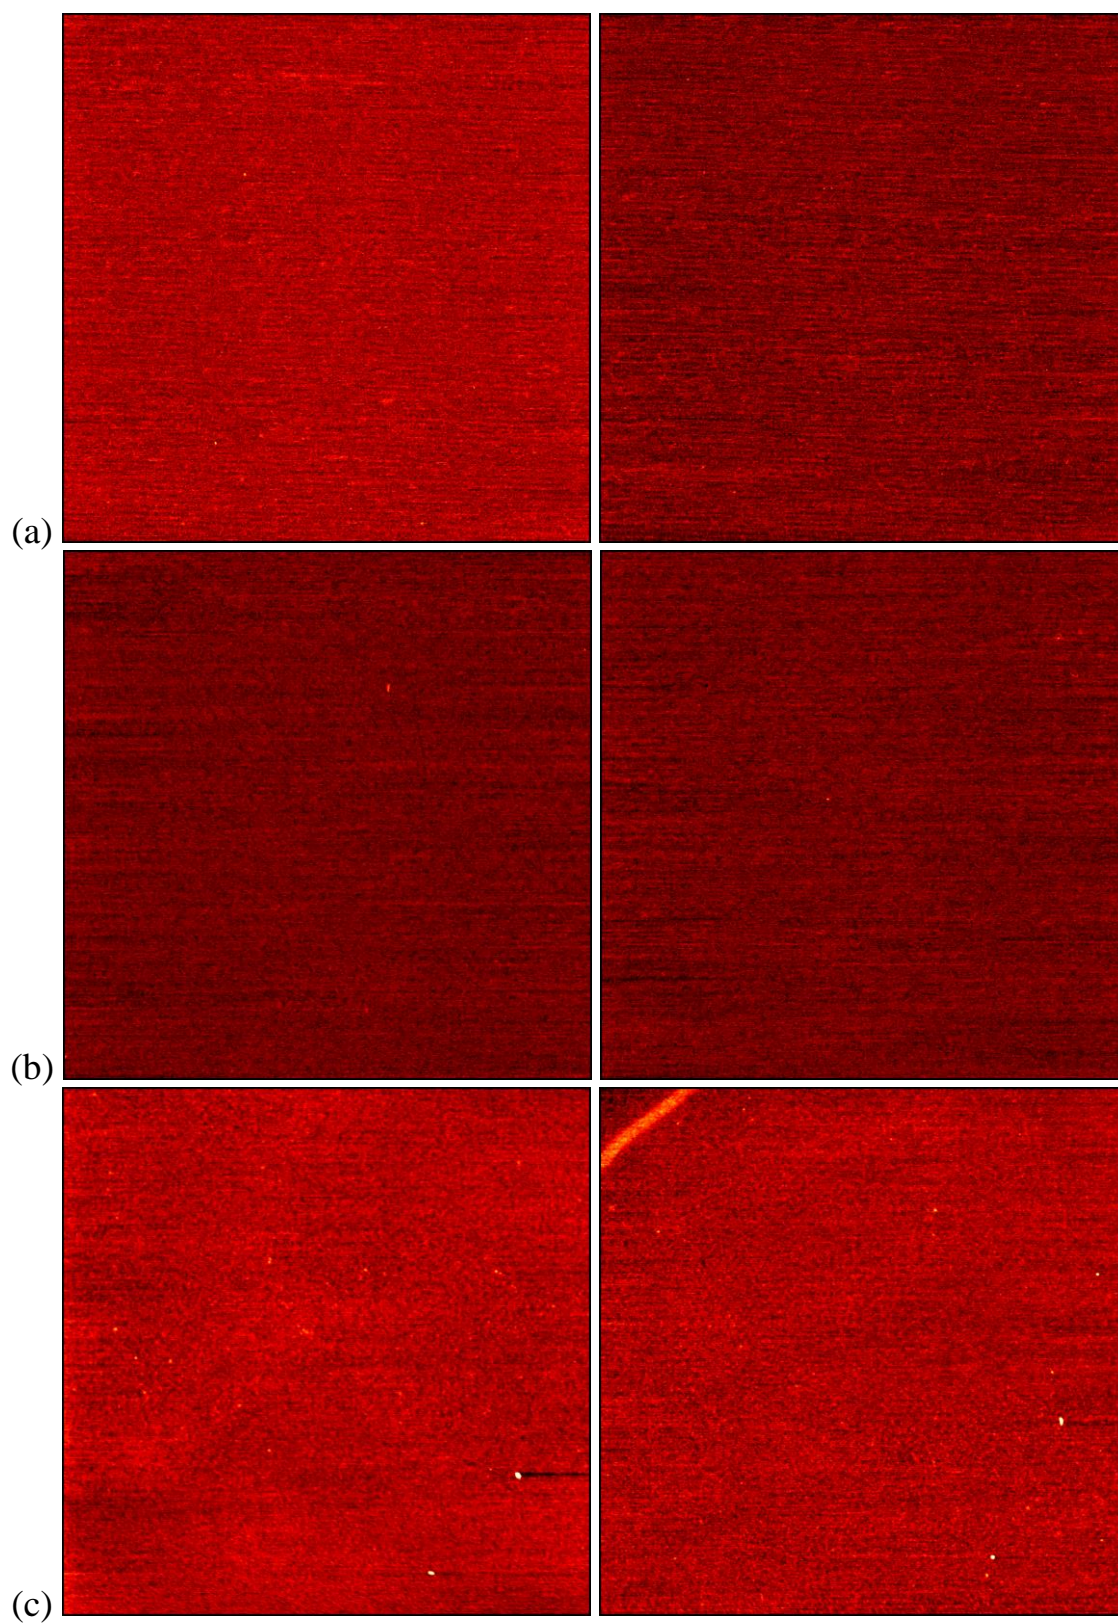

**Figure S3:** Additional AFM images of the PLL-modified mica surface before (a) and after exposure to PBS (b) and H<sub>2</sub>O (c). Images are  $3 \times 3 \mu\text{m}^2$  and have a height scale of 1.5 nm.



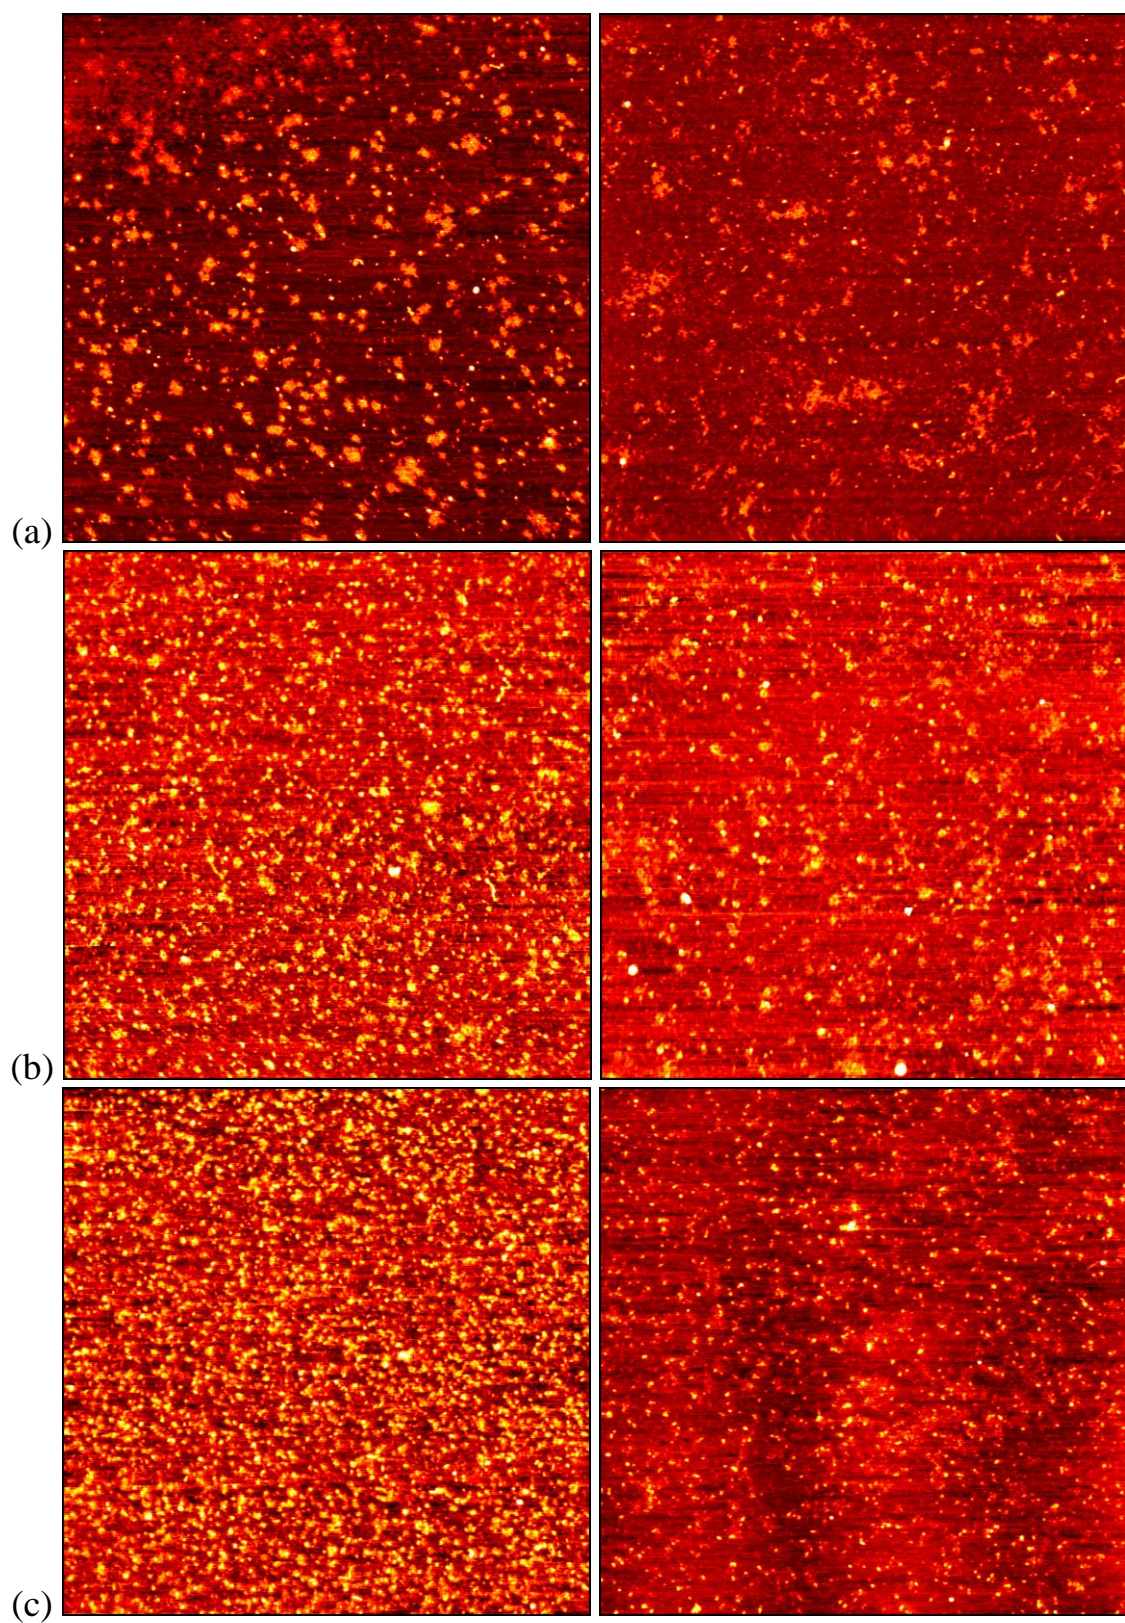

**Figure S4:** Additional AFM images of the Spdn-modified mica surface before (a) and after exposure to PBS (b) and H<sub>2</sub>O (c). Images are  $3 \times 3 \mu\text{m}^2$  and have a height scale of 1.5 nm.



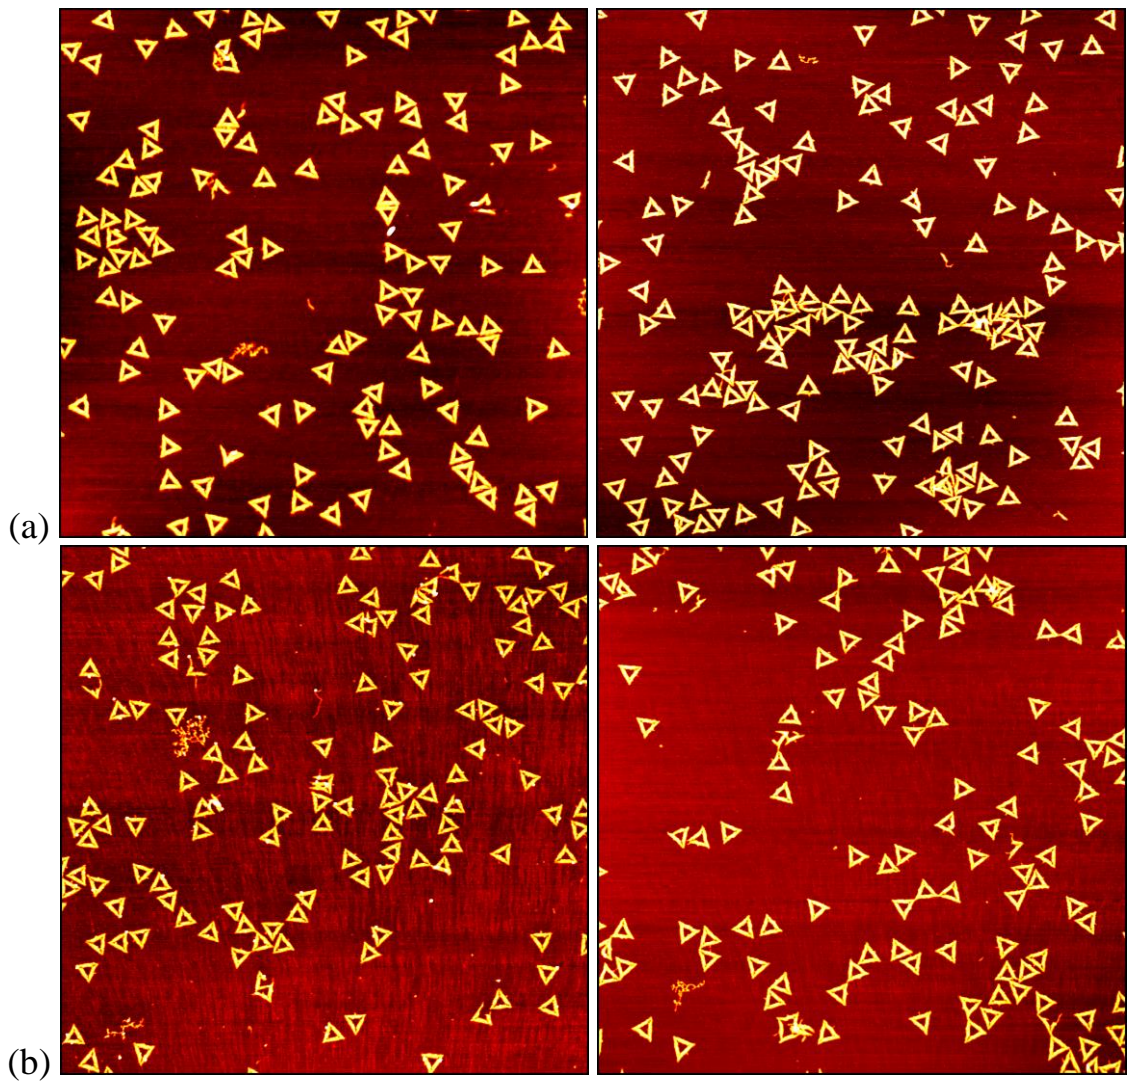

**Figure S5:** Additional AFM images of DOTs adsorbed from PBS (a) and H<sub>2</sub>O (b) via  $Mg^{2+}$  addition at the mica surface. Images are  $3 \times 3 \mu m^2$  and have a height scale of 2.5 nm.

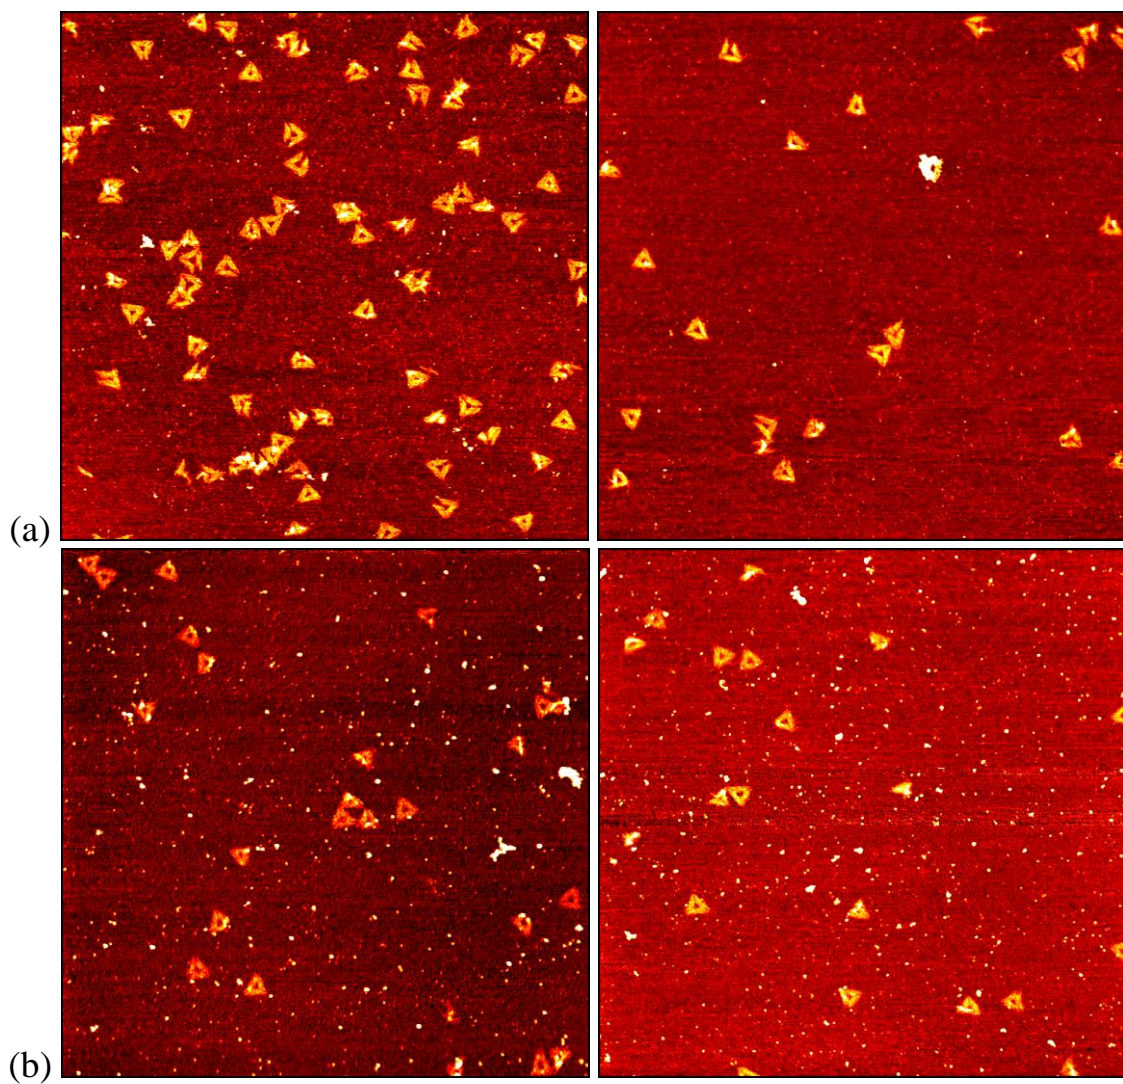

**Figure S6:** Additional AFM images of DOTs adsorbed from PBS (a) and H<sub>2</sub>O (b) at the Ni<sup>2+</sup>-modified mica surface. Images are 3 × 3 μm<sup>2</sup> and have a height scale of 2.5 nm.



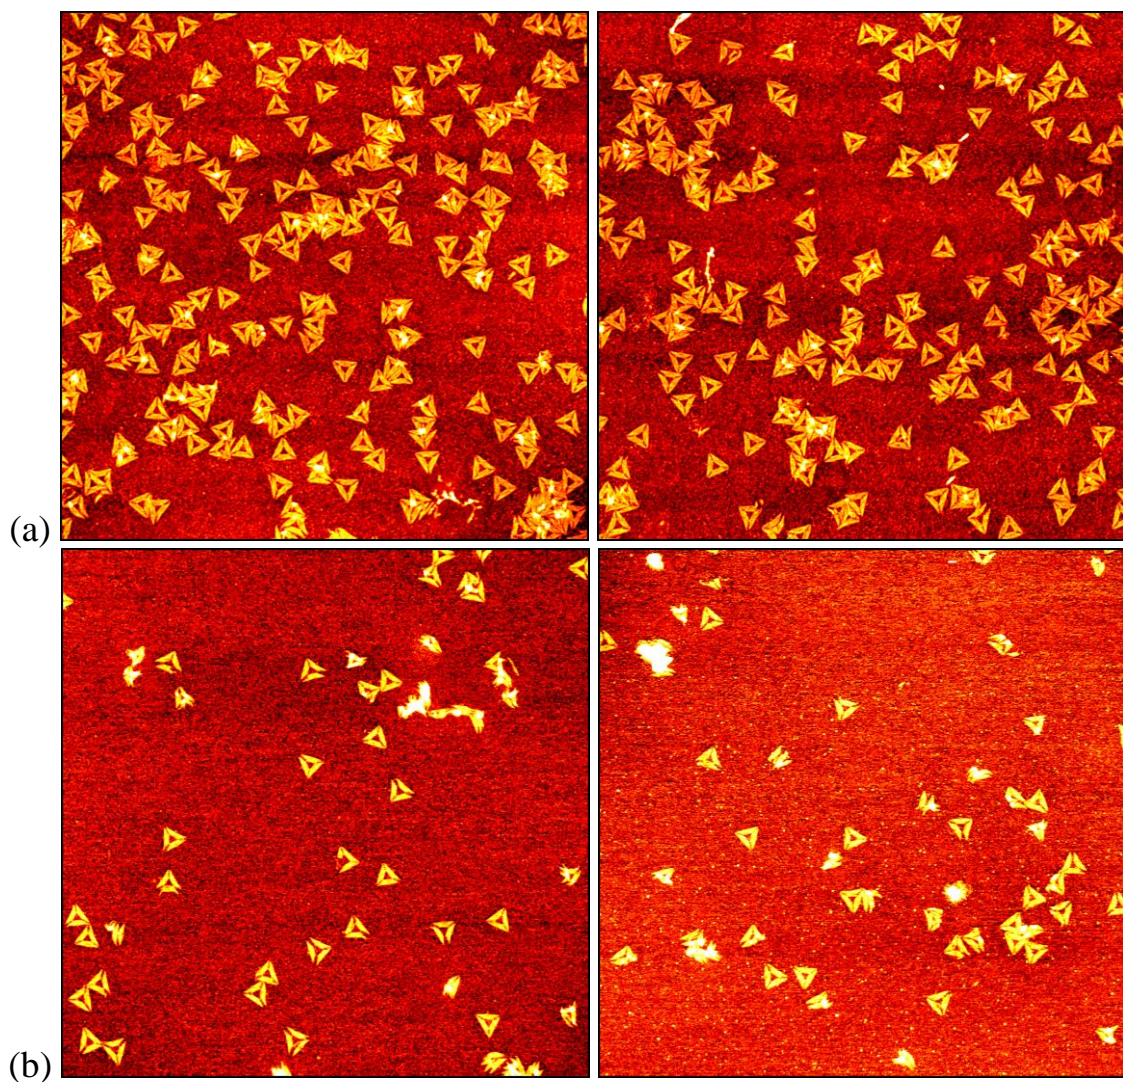

**Figure S7:** Additional AFM images of DOTs adsorbed from PBS (a) and H<sub>2</sub>O (b) at the PLL-modified mica surface. Images are  $3 \times 3 \mu\text{m}^2$  and have a height scale of 2.5 nm.



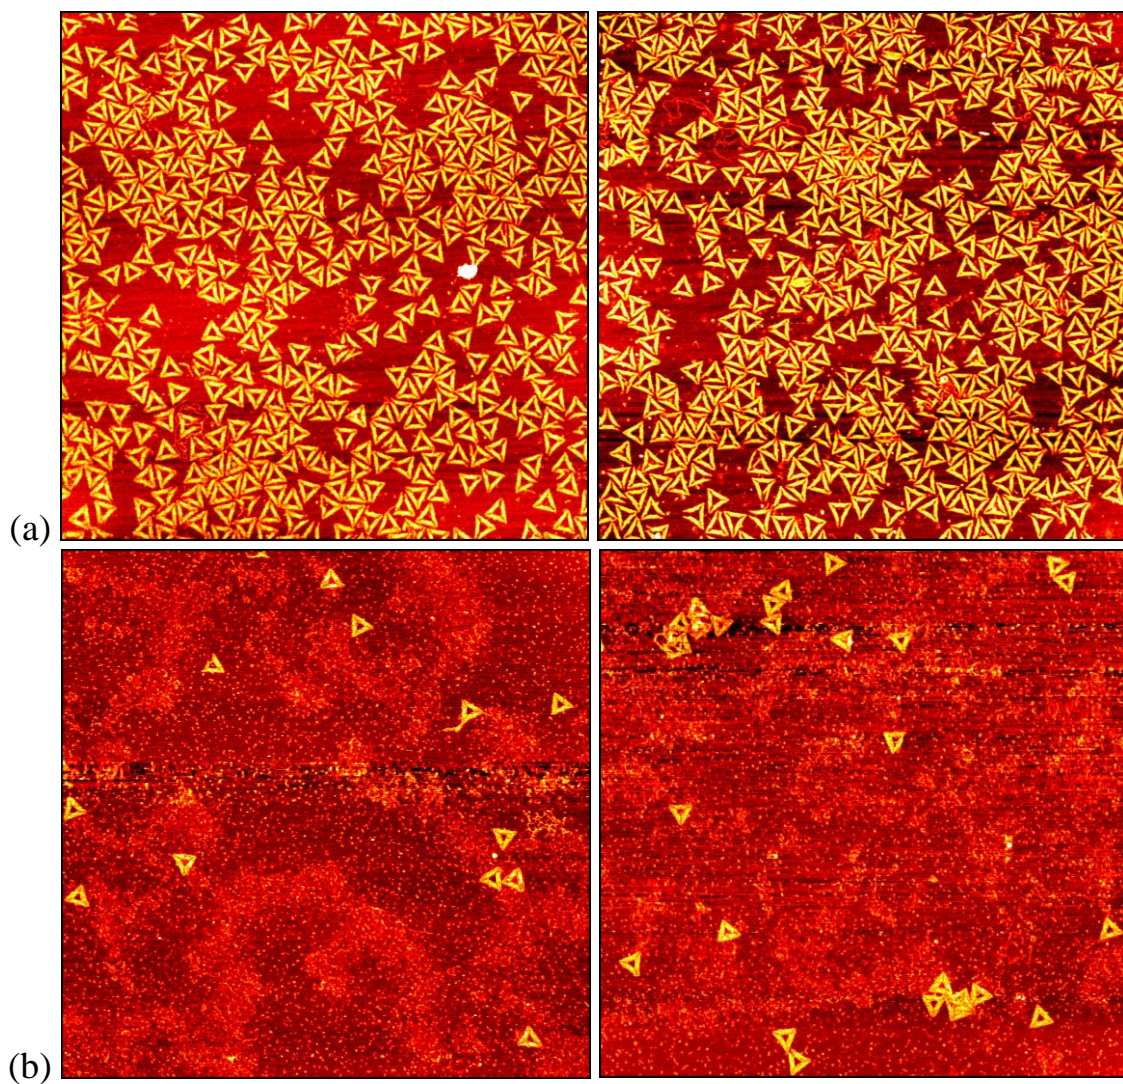

**Figure S8:** Additional AFM images of DOTs adsorbed from PBS (a) and H<sub>2</sub>O (b) at the Spdn-modified mica surface. Images are  $3 \times 3 \mu\text{m}^2$  and have a height scale of 2.5 nm.



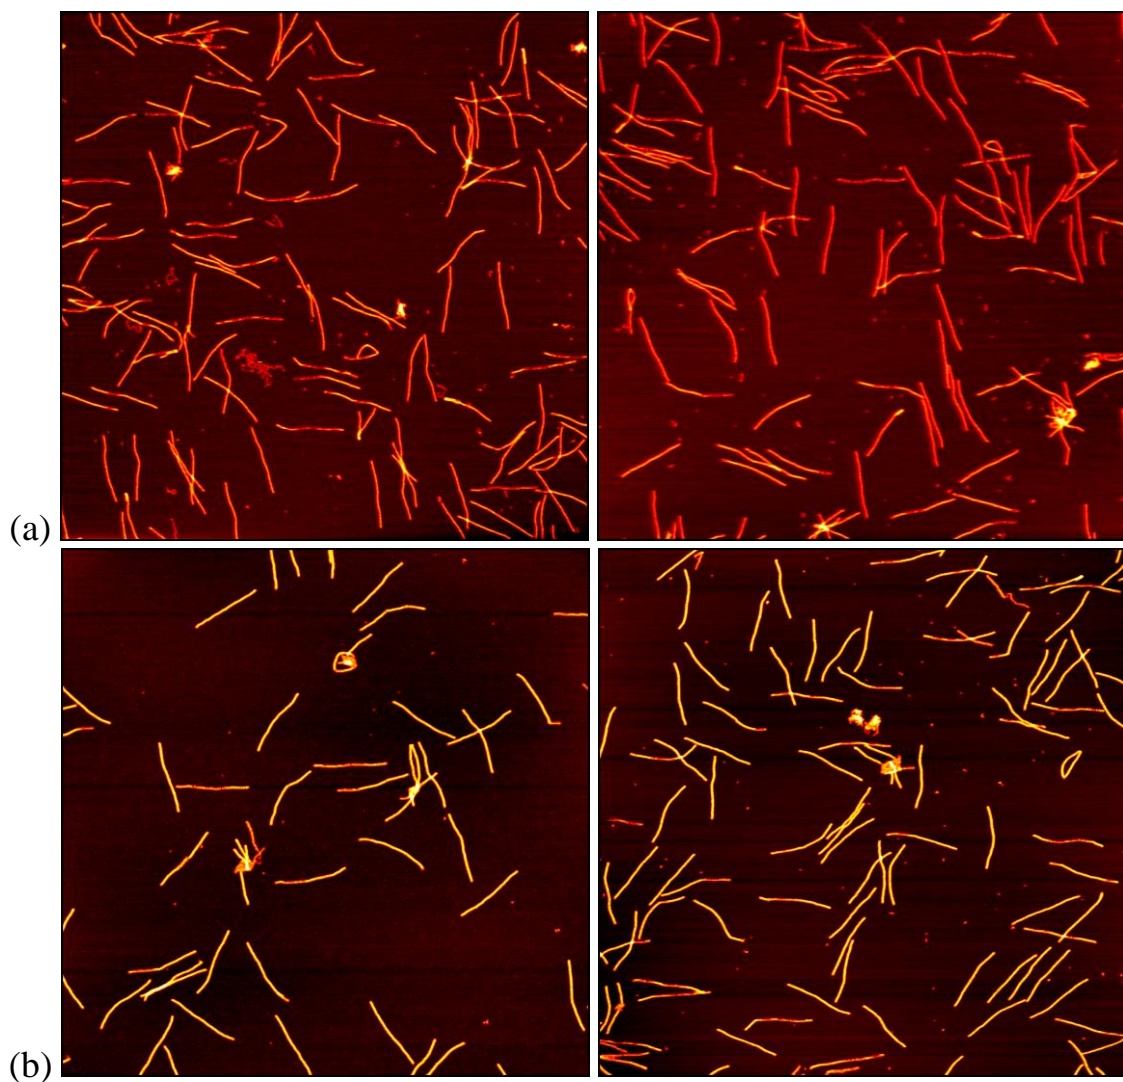

**Figure S9:** Additional AFM images of 6HBs adsorbed from PBS (a) and H<sub>2</sub>O (b) via  $Mg^{2+}$  addition at the mica surface. Images are  $3 \times 3 \mu m^2$  and have a height scale of 4 nm.

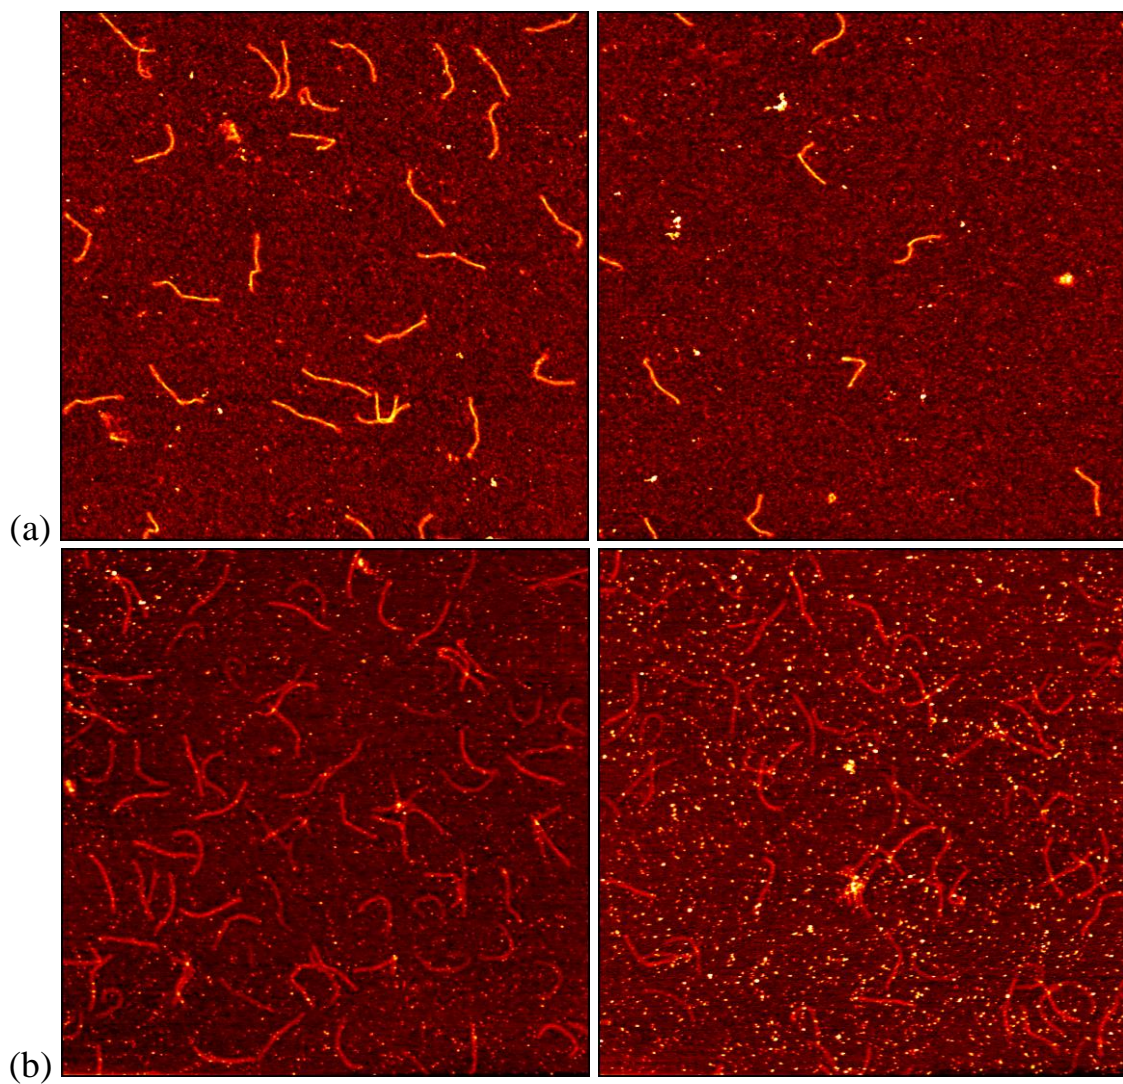

**Figure S10:** Additional AFM images of 6HBs adsorbed from PBS (a) and H<sub>2</sub>O (b) at the Ni<sup>2+</sup>-modified mica surface. Images are  $3 \times 3 \mu\text{m}^2$  and have a height scale of 4 nm.



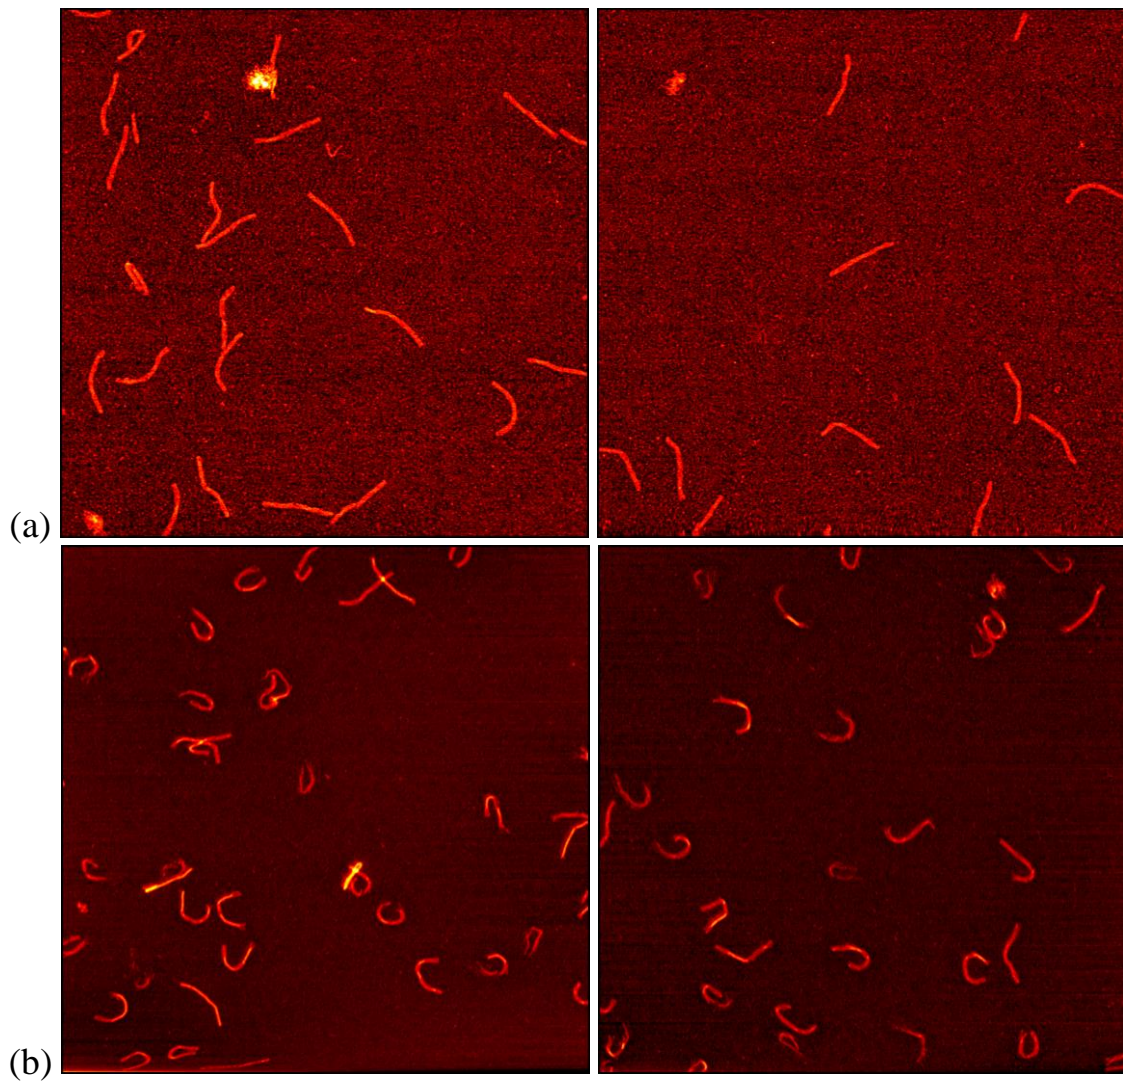

**Figure S11:** Additional AFM images of 6HBs adsorbed from PBS (a) and H<sub>2</sub>O (b) at the PLL-modified mica surface. Images are  $3 \times 3 \mu\text{m}^2$  and have a height scale of 4 nm.

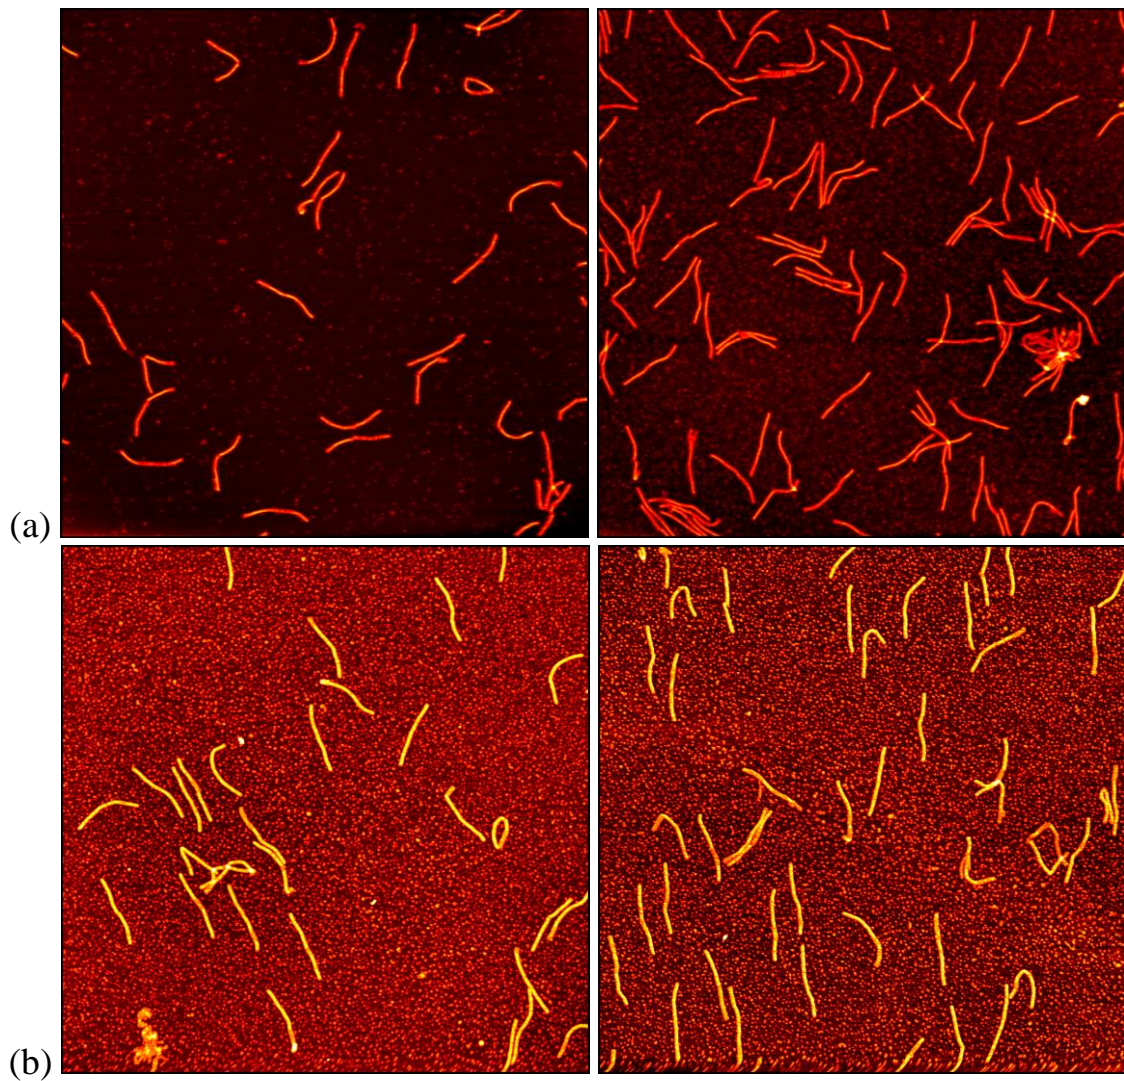

**Figure S12:** Additional AFM images of 6HBs adsorbed from PBS (a) and H<sub>2</sub>O (b) at the Spdn-modified mica surface. Images are  $3 \times 3 \mu\text{m}^2$  and have a height scale of 4 nm.
